# Supplementary material
Source: PubMed Central journal article supplement (PMC6392079)
Supplement: NIHMS1511369-supplement-13524_2018_730_MOESM1_ESM.pdf [file NIHMS1511369-supplement-13524_2018_730_MOESM1_ESM.pdf]

# Online Appendix

## A: Additional Tables

**Table S1:** Math in Early Adolescence Regressed on Maternal Experience (Years before first birth and years between first and given child) and other controls

|                                      | OLS                |                    |                    | Fixed Effects      |                    | With Mediators     |                  |                    |
|--------------------------------------|--------------------|--------------------|--------------------|--------------------|--------------------|--------------------|------------------|--------------------|
|                                      | Full Sample        | Cousin Sample      | Sibling Sample     | Cousin FE          | Sibling FE         | OLS                | Cousin FE        | Sibling FE         |
|                                      | (1)                | (2)                | (3)                | (4)                | (5)                | (6)                | (7)              | (8)                |
| Years between age 16 and first child | .039***<br>(.006)  | .029**<br>(.010)   | .043***<br>(.006)  | .028*<br>(.012)    |                    | .029***<br>(.006)  | .021<br>(.013)   |                    |
| Years between first and given child  | .032***<br>(.006)  | .029*<br>(.012)    | .033***<br>(.007)  | .034*<br>(.014)    | .018*<br>(.009)    | .028***<br>(.006)  | .027+<br>(.014)  | .017+<br>(.009)    |
| Number of siblings before birth      | -.078***<br>(.020) | -.059<br>(.036)    | -.077***<br>(.020) | -.083<br>(.052)    | .010<br>(.032)     | -.047*<br>(.021)   | -.095+<br>(.056) | .061<br>(.075)     |
| <i>Covariates</i>                    |                    |                    |                    |                    |                    |                    |                  |                    |
| Black                                | -.230***<br>(.038) | -.255***<br>(.070) | -.210***<br>(.040) |                    |                    | -.160***<br>(.043) |                  |                    |
| Hispanic                             | -.126**<br>(.042)  | -.114<br>(.075)    | -.102*<br>(.044)   | -.200***<br>(.056) |                    | -.092*<br>(.042)   | -.034<br>(.125)  |                    |
| Female                               | -.098***<br>(.024) | -.082*<br>(.041)   | -.092***<br>(.024) | -.119**<br>(.043)  | -.119***<br>(.029) | -.101***<br>(.024) | -.103*<br>(.045) | -.107***<br>(.029) |
| Firstborn                            | .002<br>(.033)     | .029<br>(.058)     | .022<br>(.034)     | .009<br>(.064)     | .069+<br>(.037)    | .035<br>(.036)     | .042<br>(.065)   | .041<br>(.040)     |
| AFQT Score                           | .014***<br>(.001)  | .014***<br>(.001)  | .014***<br>(.001)  | .009***<br>(.002)  |                    | .010***<br>(.001)  | .007**<br>(.003) |                    |
| Mom Ever Fight                       | -.101**<br>(.039)  | -.102<br>(.069)    | -.103*<br>(.040)   | -.044<br>(.107)    |                    | -.083*<br>(.038)   | -.059<br>(.105)  |                    |
| Mom Ever Steal                       | .018<br>(.033)     | .076<br>(.058)     | .028<br>(.034)     |                    |                    | .028<br>(.032)     | .041<br>(.081)   |                    |
| Mother US Born                       | -.116+<br>(.066)   | -.206+<br>(.125)   | -.119+<br>(.068)   |                    |                    | -.148*<br>(.067)   | -.254<br>(.199)  |                    |
| <i>Mediators</i>                     |                    |                    |                    |                    |                    |                    |                  |                    |
| Mother's education at birth          |                    |                    |                    |                    |                    | .040***<br>(.009)  | .042*<br>(.021)  | .015<br>(.016)     |
| HOME score at age 2/3                |                    |                    |                    |                    |                    | .102***<br>(.016)  | .046<br>(.032)   | .041*<br>(.021)    |

|                                                                       |          |        |          |        |        |                   |                   |         |
|-----------------------------------------------------------------------|----------|--------|----------|--------|--------|-------------------|-------------------|---------|
| Birth weight                                                          |          |        |          |        |        | .053***           | .069*             | .082*** |
|                                                                       |          |        |          |        |        | (.014)            | (.029)            | (.023)  |
| Prenatal cigarette use per day                                        |          |        |          |        |        | .021              | .080 <sup>+</sup> | .013    |
|                                                                       |          |        |          |        |        | (.017)            | (.047)            | (.032)  |
| Prenatal alcohol use per month                                        |          |        |          |        |        | .025 <sup>+</sup> | .028              | .019    |
|                                                                       |          |        |          |        |        | (.014)            | (.031)            | (.022)  |
| Fraction of years between birth and<br>age 13 single parent household |          |        |          |        |        | -.158***          | -.156             | -.170   |
|                                                                       |          |        |          |        |        | (.046)            | (.124)            | (.139)  |
| Number of siblings between birth<br>and age 13                        |          |        |          |        |        | -.033*            | -.078*            | .037    |
|                                                                       |          |        |          |        |        | (.016)            | (.035)            | (.071)  |
| Adjusted total family income<br>at age 2/3                            |          |        |          |        |        | .004              | .010              | -.001   |
|                                                                       |          |        |          |        |        | (.011)            | (.020)            | (.013)  |
| Fraction of 5 years before birth<br>single parent household           |          |        |          |        |        | .031              | -.001             | .158*   |
|                                                                       |          |        |          |        |        | (.046)            | (.096)            | (.074)  |
| Constant                                                              | -.566*** | -.405* | -.606*** | -.302  | .074*  | -.851***          | -.441             | -.239   |
|                                                                       | (.108)   | (.191) | (.112)   | (.218) | (.037) | (.138)            | (.384)            | (.255)  |
| Observations                                                          | 5380     | 1762   | 4967     | 1762   | 4967   | 5380              | 1762              | 4967    |

Note. Standard errors in parentheses. Age 10 to 13 math scores are standardized values for children with valid values in at least one year.

<sup>+</sup>  $p < .10$ , \*  $p < .05$ , \*\*  $p < .01$ , \*\*\*  $p < .001$

Control variables include: black, Hispanic, female, firstborn, Mother's AFQT score, mother ever fight, mother ever stole, mother US born, first born, Mom's birth year, Child's birth decade (born 1980s, 1990s, 2000s)

**Table S2:** Reading in Early Adolescence Regressed on Maternal Experience (Years before first birth and years between first and given child) and other controls

|                                      | OLS                |                    |                    | Fixed Effects       |                    | With Mediators     |                    |                   |
|--------------------------------------|--------------------|--------------------|--------------------|---------------------|--------------------|--------------------|--------------------|-------------------|
|                                      | Full Sample        | Cousin Sample      | Sibling Sample     | Cousin FE           | Sibling FE         | OLS                | Cousin FE          | Sibling FE        |
|                                      | (1)                | (2)                | (3)                | (4)                 | (5)                | (6)                | (7)                | (8)               |
| Years between age 16 and first child | .028***<br>(.006)  | .025*<br>(.010)    | .033***<br>(.006)  | .017<br>(.013)      |                    | .020***<br>(.006)  | .011<br>(.013)     |                   |
| Years between first and given child  | .036***<br>(.007)  | .038**<br>(.012)   | .039***<br>(.007)  | .042**<br>(.013)    | .035***<br>(.009)  | .033***<br>(.007)  | .035**<br>(.013)   | .033***<br>(.009) |
| Number of siblings before birth      | -.124***<br>(.020) | -.136***<br>(.037) | -.123***<br>(.020) | -.146**<br>(.052)   | -.105***<br>(.031) | -.096***<br>(.020) | -.165**<br>(.058)  | -.025<br>(.070)   |
| <i>Covariates</i>                    |                    |                    |                    |                     |                    |                    |                    |                   |
| Black                                | -.109**<br>(.042)  | -.080<br>(.077)    | -.102*<br>(.044)   |                     |                    | -.051<br>(.047)    |                    |                   |
| Hispanic                             | .064<br>(.045)     | .129<br>(.084)     | .080+<br>(.047)    | -1.057***<br>(.056) |                    | .077+<br>(.045)    | -.981***<br>(.130) |                   |
| Female                               | .139***<br>(.024)  | .134**<br>(.042)   | .139***<br>(.025)  | .090+<br>(.046)     | .134***<br>(.028)  | .130***<br>(.024)  | .102*<br>(.047)    | .142***<br>(.029) |
| Firstborn                            | .085*<br>(.033)    | .081<br>(.057)     | .080*<br>(.034)    | .079<br>(.062)      | .094**<br>(.036)   | .110**<br>(.035)   | .107+<br>(.063)    | .084*<br>(.038)   |
| AFQT Score                           | .013***<br>(.001)  | .013***<br>(.001)  | .014***<br>(.001)  | .005*<br>(.002)     |                    | .011***<br>(.001)  | .005*<br>(.002)    |                   |
| Mom Ever Fight                       | -.022<br>(.043)    | -.055<br>(.078)    | -.013<br>(.044)    | -.100<br>(.113)     |                    | -.003<br>(.042)    | -.114<br>(.111)    |                   |
| Mom Ever Steal                       | .019<br>(.034)     | .068<br>(.062)     | .023<br>(.035)     |                     |                    | .037<br>(.033)     | .053<br>(.095)     |                   |
| Mother US Born                       | -.085<br>(.070)    | -.185+<br>(.107)   | -.095<br>(.073)    |                     |                    | -.102<br>(.072)    | .057<br>(.279)     |                   |
| <i>Mediators</i>                     |                    |                    |                    |                     |                    |                    |                    |                   |
| Mother's education at birth          |                    |                    |                    |                     |                    | .030**<br>(.009)   | .016<br>(.019)     | .004<br>(.014)    |
| HOME score at age 2/3                |                    |                    |                    |                     |                    | .107***<br>(.017)  | .060+<br>(.033)    | .046*<br>(.022)   |
| Birth weight                         |                    |                    |                    |                     |                    | .040**<br>(.014)   | .055+<br>(.029)    | .056*<br>(.022)   |

|                                                                       |                                |                               |                                |                |                              |                                |                              |                 |
|-----------------------------------------------------------------------|--------------------------------|-------------------------------|--------------------------------|----------------|------------------------------|--------------------------------|------------------------------|-----------------|
| Prenatal cigarette use per day                                        |                                |                               |                                |                |                              | -.017<br>(.018)                | .082 <sup>+</sup><br>(.044)  | .016<br>(.029)  |
| Prenatal alcohol use per month                                        |                                |                               |                                |                |                              | -.003<br>(.014)                | -.002<br>(.031)              | -.009<br>(.020) |
| Fraction of years between birth and<br>age 13 single parent household |                                |                               |                                |                |                              | -.168 <sup>***</sup><br>(.051) | -.218 <sup>+</sup><br>(.129) | -.138<br>(.137) |
| Number of siblings between birth<br>and age 13                        |                                |                               |                                |                |                              | -.031 <sup>*</sup><br>(.016)   | -.093 <sup>*</sup><br>(.038) | .073<br>(.067)  |
| Adjusted total family income<br>at age 2/3                            |                                |                               |                                |                |                              | .005<br>(.011)                 | -.000<br>(.024)              | -.013<br>(.014) |
| Fraction of 5 years before birth<br>single parent household           |                                |                               |                                |                |                              | .059<br>(.048)                 | .049<br>(.102)               | .044<br>(.074)  |
| Constant                                                              | -.743 <sup>***</sup><br>(.118) | -.668 <sup>**</sup><br>(.211) | -.797 <sup>***</sup><br>(.123) | .028<br>(.241) | -.060 <sup>+</sup><br>(.036) | -.936 <sup>***</sup><br>(.148) | -.073<br>(.431)              | -.241<br>(.233) |
| Observations                                                          | 5376                           | 1762                          | 4963                           | 1762           | 4963                         | 5376                           | 1762                         | 4963            |

Note. Standard errors in parentheses. Age 10 to 13 reading scores are standardized values for children with valid values in at least one year.

<sup>+</sup>  $p < .10$ , <sup>\*</sup>  $p < .05$ , <sup>\*\*</sup>  $p < .01$ , <sup>\*\*\*</sup>  $p < .001$

Control variables include: black, Hispanic, female, firstborn, Mother's AFQT score, mother ever fight, mother ever stole, mother US born, first born, Mom's birth year, Child's birth decade (born 1980s, 1990s, 2000s)

**Table S3:** Externalizing in Early Adolescence Regressed on Maternal Experience (Years before first birth and years between first and given child) and other controls

|                                      | OLS                |                    |                    | Fixed Effects      |                    | With Mediators     |                    |                    |
|--------------------------------------|--------------------|--------------------|--------------------|--------------------|--------------------|--------------------|--------------------|--------------------|
|                                      | Full Sample        | Cousin Sample      | Sibling Sample     | Cousin FE          | Sibling FE         | OLS                | Cousin FE          | Sibling FE         |
|                                      | (1)                | (2)                | (3)                | (4)                | (5)                | (6)                | (7)                | (8)                |
| Years between age 16 and first child | -.029***<br>(.006) | -.028**<br>(.009)  | -.034***<br>(.006) | -.021+<br>(.012)   |                    | -.019**<br>(.006)  | -.020<br>(.012)    |                    |
| Years between first and given child  | -.016*<br>(.007)   | -.027*<br>(.013)   | -.017*<br>(.007)   | -.008<br>(.013)    | -.024*<br>(.010)   | -.017*<br>(.007)   | -.005<br>(.013)    | -.025*<br>(.010)   |
| Number of siblings before birth      | -.005<br>(.022)    | .038<br>(.038)     | -.006<br>(.022)    | -.058<br>(.040)    | -.000<br>(.030)    | -.032<br>(.022)    | -.081+<br>(.044)   | .060<br>(.063)     |
| <i>Covariates</i>                    |                    |                    |                    |                    |                    |                    |                    |                    |
| Black                                | -.022<br>(.046)    | -.055<br>(.084)    | -.019<br>(.049)    |                    |                    | -.111*<br>(.048)   |                    |                    |
| Hispanic                             | -.073<br>(.047)    | -.086<br>(.085)    | -.071<br>(.050)    | .321<br>(.326)     |                    | -.055<br>(.045)    | .228<br>(.334)     |                    |
| Female                               | -.244***<br>(.025) | -.251***<br>(.042) | -.260***<br>(.027) | -.233***<br>(.040) | -.204***<br>(.028) | -.222***<br>(.025) | -.220***<br>(.040) | -.204***<br>(.028) |
| Firstborn                            | -.007<br>(.037)    | .044<br>(.063)     | -.035<br>(.037)    | .002<br>(.058)     | -.060+<br>(.036)   | -.029<br>(.038)    | -.015<br>(.061)    | -.067+<br>(.039)   |
| AFQT Score                           | -.003***<br>(.001) | -.004**<br>(.001)  | -.002**<br>(.001)  | -.005**<br>(.002)  |                    | .001<br>(.001)     | -.004*<br>(.002)   |                    |
| Mom Ever Fight                       | .067<br>(.046)     | .085<br>(.074)     | .050<br>(.048)     | -.093<br>(.099)    |                    | .029<br>(.043)     | -.116<br>(.095)    |                    |
| Mom Ever Steal                       | .070+<br>(.039)    | .056<br>(.057)     | .073+<br>(.042)    |                    |                    | .029<br>(.038)     | .095<br>(.072)     |                    |
| Mother US Born                       | .037<br>(.072)     | .141<br>(.116)     | .052<br>(.075)     |                    |                    | .025<br>(.069)     | -.233<br>(.239)    |                    |
| <i>Mediators</i>                     |                    |                    |                    |                    |                    |                    |                    |                    |
| Mother's education at birth          |                    |                    |                    |                    |                    | -.023*<br>(.010)   | .000<br>(.019)     | -.014<br>(.014)    |
| HOME score at age 2/3                |                    |                    |                    |                    |                    | -.154***<br>(.017) | -.089**<br>(.031)  | -.024<br>(.021)    |
| Birth weight                         |                    |                    |                    |                    |                    | -.009<br>(.015)    | -.000<br>(.026)    | -.018<br>(.021)    |

|                                                                       |         |        |         |        |         |         |                   |        |
|-----------------------------------------------------------------------|---------|--------|---------|--------|---------|---------|-------------------|--------|
| Prenatal cigarette use per day                                        |         |        |         |        |         | .104*** | .055              | .022   |
|                                                                       |         |        |         |        |         | (.020)  | (.047)            | (.034) |
| Prenatal alcohol use per month                                        |         |        |         |        |         | .013    | .019              | -.016  |
|                                                                       |         |        |         |        |         | (.014)  | (.026)            | (.021) |
| Fraction of years between birth and<br>age 13 single parent household |         |        |         |        |         | .236*** | .122              | .041   |
|                                                                       |         |        |         |        |         | (.052)  | (.111)            | (.126) |
| Number of siblings between birth<br>and age 13                        |         |        |         |        |         | -.024   | -.032             | .065   |
|                                                                       |         |        |         |        |         | (.017)  | (.033)            | (.060) |
| Adjusted total family income<br>at age 2/3                            |         |        |         |        |         | -.024** | -.022             | -.003  |
|                                                                       |         |        |         |        |         | (.008)  | (.014)            | (.011) |
| Fraction of 5 years before birth<br>single parent household           |         |        |         |        |         | .024    | .155 <sup>+</sup> | .020   |
|                                                                       |         |        |         |        |         | (.047)  | (.084)            | (.079) |
| Constant                                                              | .457*** | .179   | .475*** | .344   | .174*** | .545*** | .400              | .213   |
|                                                                       | (.122)  | (.197) | (.128)  | (.215) | (.035)  | (.149)  | (.357)            | (.225) |
| Observations                                                          | 5673    | 1830   | 5215    | 1830   | 5215    | 5673    | 1830              | 5215   |

Note. Standard errors in parentheses. Age 10 to 13 externalizing scores are standardized values for children with valid values in at least one year.

<sup>+</sup>  $p < .10$ , \*  $p < .05$ , \*\*  $p < .01$ , \*\*\*  $p < .001$

Control variables include: black, Hispanic, female, firstborn, Mother's AFQT score, mother ever fight, mother ever stole, mother US born, first born, Mom's birth year, Child's birth decade (born 1980s, 1990s, 2000s)

**Table S4:** Fraction of years between birth and age 13 single parent household regressed on maternal experience (Years before first birth and years between first and given child) and controls

|                                      | OLS                |                    |                    | Fixed Effects     |                   |
|--------------------------------------|--------------------|--------------------|--------------------|-------------------|-------------------|
|                                      | Full Sample        | Cousin Sample      | Sibling Sample     | Cousin FE         | Sibling FE        |
|                                      | (1)                | (2)                | (3)                | (4)               | (5)               |
| Years between age 16 and first child | -.008***<br>(.002) | -.010**<br>(.003)  | -.011***<br>(.002) | .001<br>(.003)    | .001<br>(.027)    |
| Years between first and given child  | .002<br>(.002)     | .001<br>(.004)     | .002<br>(.002)     | -.006<br>(.003)   | -.005*<br>(.002)  |
| Number of siblings before birth      | .008<br>(.009)     | .013<br>(.015)     | .007<br>(.009)     | .027*<br>(.012)   | .023***<br>(.006) |
| <i>Mediator</i>                      |                    |                    |                    |                   |                   |
| Mother's Education at birth          | -.023***<br>(.003) | -.027***<br>(.006) | -.020***<br>(.003) | -.014*<br>(.006)  | -.003<br>(.002)   |
| <i>Covariates</i>                    |                    |                    |                    |                   |                   |
| Black                                | .301***<br>(.019)  | .305***<br>(.036)  | .290***<br>(.020)  | .185***<br>(.055) |                   |
| Hispanic                             | .047*<br>(.019)    | .065+<br>(.038)    | .035+<br>(.019)    | -.184<br>(.233)   |                   |
| Female                               | -.004<br>(.008)    | -.020<br>(.014)    | -.006<br>(.008)    | -.005<br>(.011)   | .010**<br>(.004)  |
| Firstborn                            | .071***<br>(.011)  | .074***<br>(.020)  | .026*<br>(.010)    | .030*<br>(.013)   | .008<br>(.006)    |
| AFQT Score                           | -.002***<br>(.000) | -.002***<br>(.001) | -.002***<br>(.000) | -.002**<br>(.001) |                   |
| Mom Ever Fight                       | .043*<br>(.018)    | .043<br>(.030)     | .038*<br>(.019)    | -.030<br>(.036)   |                   |
| Mom Ever Steal                       | .030*<br>(.014)    | .025<br>(.023)     | .028+<br>(.014)    | .057+<br>(.029)   |                   |
| Mother US Born                       | .098***<br>(.027)  | .105+<br>(.058)    | .092***<br>(.028)  | -.098<br>(.094)   |                   |
| Constant                             | .561***<br>(.050)  | .643***<br>(.103)  | .559***<br>(.052)  | .705***<br>(.135) | .321<br>(.207)    |
| Observations                         | 7720               | 2433               | 6958               | 2433              | 6958              |

Note. Standard errors in parentheses

+  $p < .10$ , \*  $p < .05$ , \*\*  $p < .01$ , \*\*\*  $p < .001$

Dependent variable is standardized. Control variables include: Mom's birth year, Child's birth decade (born 1980s, 1990s, 2000s)

**Table S5:** Number of siblings between birth and age 13 regressed on maternal experience (Years before first birth and years between first and given child) and controls

|                                      | OLS                |                    |                    | Fixed Effects      |                     |
|--------------------------------------|--------------------|--------------------|--------------------|--------------------|---------------------|
|                                      | Full Sample        | Cousin Sample      | Sibling Sample     | Cousin FE          | Sibling FE          |
|                                      | (1)                | (2)                | (3)                | (4)                | (5)                 |
| Years between age 16 and first child | -.052***<br>(.004) | -.061***<br>(.008) | -.044***<br>(.004) | -.083***<br>(.010) |                     |
| Years between first and given child  | -.058***<br>(.005) | -.068***<br>(.008) | -.056***<br>(.005) | -.046***<br>(.012) | .033***<br>(.005)   |
| Number of siblings before birth      | .073**<br>(.025)   | .118**<br>(.045)   | .073**<br>(.024)   | -.346***<br>(.050) | -1.000***<br>(.027) |
| <i>Mediator</i>                      |                    |                    |                    |                    |                     |
| Mother's Education at birth          | .007<br>(.008)     | .004<br>(.016)     | -.000<br>(.008)    | .002<br>(.014)     | -.000<br>(.004)     |
| <i>Covariates</i>                    |                    |                    |                    |                    |                     |
| Black                                | .141**<br>(.044)   | .096<br>(.090)     | .161***<br>(.047)  | -.168<br>(.170)    |                     |
| Hispanic                             | .189***<br>(.041)  | .148+<br>(.086)    | .170***<br>(.043)  | .518+<br>(.281)    |                     |
| Female                               | -.011<br>(.019)    | -.036<br>(.038)    | -.015<br>(.019)    | -.005<br>(.035)    | -.008<br>(.008)     |
| Firstborn                            | .452***<br>(.027)  | .548***<br>(.053)  | .833***<br>(.025)  | .313***<br>(.038)  | .087***<br>(.019)   |
| AFQT Score                           | .002**<br>(.001)   | .003*<br>(.002)    | .002*<br>(.001)    | .002<br>(.002)     |                     |
| Mom Ever Fight                       | .044<br>(.045)     | .041<br>(.089)     | .054<br>(.047)     | .002<br>(.107)     |                     |
| Mom Ever Steal                       | -.031<br>(.033)    | -.034<br>(.054)    | -.042<br>(.035)    | .038<br>(.086)     |                     |
| Mother US Born                       | -.106*<br>(.052)   | -.032<br>(.092)    | -.088<br>(.054)    | -.326<br>(.340)    |                     |
| Constant                             | .929***<br>(.109)  | .953***<br>(.206)  | .957***<br>(.112)  | 1.830***<br>(.441) | 3.235<br>(3.107)    |
| Observations                         | 7740               | 2437               | 6978               | 2437               | 6978                |

Note. Standard errors in parentheses

+  $p < .10$ , \*  $p < .05$ , \*\*  $p < .01$ , \*\*\*  $p < .001$

Dependent variable is standardized. Control variables include: Mom's birth year, Child's birth decade (born 1980s, 1990s, 2000s)



**Table S6:** Birth Weight regressed on maternal experience (Years before first birth and years between first and given child) and controls

|                                      | OLS                |                    |                    | Fixed Effects       |                    |
|--------------------------------------|--------------------|--------------------|--------------------|---------------------|--------------------|
|                                      | Full Sample        | Cousin Sample      | Sibling Sample     | Cousin FE           | Sibling FE         |
|                                      | (1)                | (2)                | (3)                | (4)                 | (5)                |
| Years between age 16 and first child | -.008<br>(.006)    | -.007<br>(.011)    | -.009<br>(.007)    | -.012<br>(.013)     |                    |
| Years between first and given child  | -.009<br>(.007)    | -.000<br>(.013)    | -.010<br>(.007)    | -.004<br>(.015)     | -.009<br>(.009)    |
| Number of siblings before birth      | .050*<br>(.024)    | .037<br>(.050)     | .051*<br>(.024)    | .038<br>(.053)      | .057<br>(.035)     |
| <i>Mediator</i>                      |                    |                    |                    |                     |                    |
| Mother's Education at birth          | .019*<br>(.009)    | .013<br>(.017)     | .020*<br>(.010)    | .010<br>(.020)      | -.002<br>(.015)    |
| <i>Covariates</i>                    |                    |                    |                    |                     |                    |
| Black                                | -.320***<br>(.043) | -.303***<br>(.081) | -.330***<br>(.046) | -1.243***<br>(.182) |                    |
| Hispanic                             | .010<br>(.041)     | -.034<br>(.070)    | .026<br>(.043)     | .228<br>(.515)      |                    |
| Female                               | -.190***<br>(.024) | -.162***<br>(.043) | -.187***<br>(.026) | -.183***<br>(.045)  | -.172***<br>(.028) |
| Firstborn                            | -.094*<br>(.036)   | -.061<br>(.064)    | -.074*<br>(.037)   | -.082<br>(.064)     | -.089*<br>(.039)   |
| AFQT Score                           | .003***<br>(.001)  | .004**<br>(.001)   | .003**<br>(.001)   | -.001<br>(.002)     |                    |
| Mom Ever Fight                       | -.056<br>(.042)    | -.068<br>(.074)    | -.058<br>(.045)    | .057<br>(.113)      |                    |
| Mom Ever Steal                       | -.022<br>(.034)    | .033<br>(.058)     | -.005<br>(.036)    | -.066<br>(.094)     |                    |
| Mother US Born                       | -.166**<br>(.055)  | -.002<br>(.097)    | -.172**<br>(.059)  | -.304<br>(.374)     |                    |
| Constant                             | .122<br>(.132)     | -.118<br>(.258)    | .092<br>(.140)     | .801+<br>(.481)     | .170<br>(.195)     |
| Observations                         | 6684               | 2103               | 5988               | 2103                | 5988               |

Note. Standard errors in parentheses

+  $p < .10$ , \*  $p < .05$ , \*\*  $p < .01$ , \*\*\*  $p < .001$

Standardized birth weight after truncating to the .5 and 99.5 percentiles

Control variables include: Mom's birth year, Child's birth decade (born 1980s, 1990s, 2000s)

**Table S7:** Prenatal cigarette use regressed on maternal experience (Years before first birth and years between first and given child) and controls

|                                      | OLS                |                    |                    | Fixed Effects    |                  |
|--------------------------------------|--------------------|--------------------|--------------------|------------------|------------------|
|                                      | Full Sample        | Cousin Sample      | Sibling Sample     | Cousin FE        | Sibling FE       |
|                                      | (1)                | (2)                | (3)                | (4)              | (5)              |
| Years between age 16 and first child | -.019***<br>(.005) | -.010<br>(.008)    | -.025***<br>(.005) | -.019*<br>(.008) |                  |
| Years between first and given child  | .012+<br>(.007)    | .015<br>(.011)     | .010<br>(.007)     | -.011<br>(.011)  | -.010<br>(.007)  |
| Number of siblings before birth      | -.030<br>(.024)    | .010<br>(.048)     | -.032<br>(.024)    | .014<br>(.042)   | -.012<br>(.024)  |
| <i>Mediator</i>                      |                    |                    |                    |                  |                  |
| Mother's Education at birth          | -.070***<br>(.009) | -.064***<br>(.016) | -.068***<br>(.010) | -.027+<br>(.014) | -.015<br>(.010)  |
| <i>Covariates</i>                    |                    |                    |                    |                  |                  |
| Black                                | -.323***<br>(.046) | -.385***<br>(.090) | -.321***<br>(.050) | .152<br>(.147)   |                  |
| Hispanic                             | -.518***<br>(.042) | -.618***<br>(.080) | -.534***<br>(.045) | -.165<br>(.531)  |                  |
| Female                               | -.038+<br>(.022)   | -.039<br>(.039)    | -.022<br>(.024)    | -.078*<br>(.034) | -.033+<br>(.019) |
| Firstborn                            | .025<br>(.034)     | .064<br>(.064)     | -.009<br>(.033)    | .007<br>(.046)   | -.060*<br>(.025) |
| AFQT Score                           | -.003***<br>(.001) | -.006***<br>(.001) | -.003**<br>(.001)  | -.004+<br>(.002) |                  |
| Mom Ever Fight                       | .125**<br>(.046)   | .117<br>(.082)     | .122*<br>(.049)    | .052<br>(.098)   |                  |
| Mom Ever Steal                       | .168***<br>(.037)  | .135*<br>(.058)    | .175***<br>(.040)  | .072<br>(.075)   |                  |
| Mother US Born                       | .192***<br>(.058)  | .187*<br>(.087)    | .168**<br>(.063)   | .110<br>(.187)   |                  |
| Constant                             | 1.152***<br>(.132) | 1.192***<br>(.254) | 1.191***<br>(.141) | .616*<br>(.293)  | .226<br>(.138)   |
| Observations                         | 6819               | 2148               | 6120               | 2148             | 6120             |

Note. Standard errors in parentheses

+  $p < .10$ , \*  $p < .05$ , \*\*  $p < .01$ , \*\*\*  $p < .001$

Dependent variable is standardized. Control variables include: Mom's birth year, Child's birth decade (born 1980s, 1990s, 2000s)

**Table S8:** Prenatal alcohol use regressed on maternal experience (Years before first birth and years between first and given child) and controls

|                                      | OLS                          |                             |                              | Fixed Effects                |                  |
|--------------------------------------|------------------------------|-----------------------------|------------------------------|------------------------------|------------------|
|                                      | Full Sample                  | Cousin Sample               | Sibling Sample               | Cousin FE                    | Sibling FE       |
|                                      | (1)                          | (2)                         | (3)                          | (4)                          | (5)              |
| Years between age 16 and first child | -.010 <sup>+</sup><br>(.006) | -.011<br>(.010)             | -.010 <sup>+</sup><br>(.006) | -.023 <sup>+</sup><br>(.012) |                  |
| Years between first and given child  | .004<br>(.006)               | -.007<br>(.011)             | .004<br>(.006)               | -.020 <sup>+</sup><br>(.011) | -.019*<br>(.009) |
| Number of siblings before birth      | -.079***<br>(.021)           | -.044<br>(.037)             | -.078***<br>(.021)           | -.038<br>(.038)              | -.008<br>(.030)  |
| <i>Mediator</i>                      |                              |                             |                              |                              |                  |
| Mother's Education at birth          | -.027**<br>(.009)            | -.037*<br>(.015)            | -.026**<br>(.009)            | -.043*<br>(.019)             | -.011<br>(.013)  |
| <i>Covariates</i>                    |                              |                             |                              |                              |                  |
| Black                                | -.078 <sup>+</sup><br>(.042) | -.196*<br>(.077)            | -.064<br>(.045)              | .109<br>(.184)               |                  |
| Hispanic                             | -.105*<br>(.043)             | -.190*<br>(.080)            | -.107*<br>(.046)             | -.818<br>(.542)              |                  |
| Female                               | -.022<br>(.024)              | -.009<br>(.041)             | -.027<br>(.025)              | -.007<br>(.043)              | .001<br>(.028)   |
| Firstborn                            | .050<br>(.034)               | .072<br>(.060)              | .055<br>(.034)               | .064<br>(.056)               | .024<br>(.034)   |
| AFQT Score                           | .009***<br>(.001)            | .008***<br>(.001)           | .009***<br>(.001)            | .002<br>(.003)               |                  |
| Mom Ever Fight                       | -.048<br>(.040)              | -.024<br>(.068)             | -.047<br>(.042)              | -.086<br>(.095)              |                  |
| Mom Ever Steal                       | .208***<br>(.035)            | .183**<br>(.059)            | .212***<br>(.037)            | .032<br>(.084)               |                  |
| Mother US Born                       | .261***<br>(.052)            | .195 <sup>+</sup><br>(.105) | .268***<br>(.055)            | -.190<br>(.354)              |                  |
| Constant                             | -.003<br>(.127)              | .331<br>(.241)              | -.019<br>(.135)              | 1.386**<br>(.436)            | .267<br>(.170)   |
| Observations                         | 6836                         | 2153                        | 6136                         | 2153                         | 6136             |

Note. Standard errors in parentheses

<sup>+</sup>  $p < .10$ , \*  $p < .05$ , \*\*  $p < .01$ , \*\*\*  $p < .001$

Dependent variable is standardized. Control variables include: Mom's birth year, Child's birth decade (born 1980s, 1990s, 2000s)

**Table S9:** HOME score at age 2/3 regressed on maternal experience (Years before first birth and years between first and given child) and controls

|                                      | OLS                |                    |                    | Fixed Effects     |                   |
|--------------------------------------|--------------------|--------------------|--------------------|-------------------|-------------------|
|                                      | Full Sample        | Cousin Sample      | Sibling Sample     | Cousin FE         | Sibling FE        |
|                                      | (1)                | (2)                | (3)                | (4)               | (5)               |
| Years between age 16 and first child | -.000<br>(.006)    | -.007<br>(.010)    | -.001<br>(.006)    | -.009<br>(.012)   |                   |
| Years between first and given child  | .004<br>(.007)     | .006<br>(.013)     | .001<br>(.007)     | .023<br>(.015)    | .002<br>(.011)    |
| Number of siblings before birth      | -.135***<br>(.024) | -.141**<br>(.047)  | -.133***<br>(.024) | -.172**<br>(.055) | -.086*<br>(.034)  |
| <i>Mediator</i>                      |                    |                    |                    |                   |                   |
| Mother's Education at birth          | .045***<br>(.009)  | .050**<br>(.017)   | .048***<br>(.009)  | .038*<br>(.019)   | .022<br>(.014)    |
| <i>Covariates</i>                    |                    |                    |                    |                   |                   |
| Black                                | -.566***<br>(.042) | -.549***<br>(.075) | -.574***<br>(.045) | .601***<br>(.153) |                   |
| Hispanic                             | -.160***<br>(.044) | -.260**<br>(.090)  | -.149**<br>(.046)  | -.052<br>(.147)   |                   |
| Female                               | .095***<br>(.022)  | .142***<br>(.039)  | .091***<br>(.024)  | .091*<br>(.043)   | .098***<br>(.029) |
| Firstborn                            | .075*<br>(.034)    | .102<br>(.064)     | .075*<br>(.035)    | .099<br>(.064)    | .096**<br>(.036)  |
| AFQT Score                           | .005***<br>(.001)  | .007***<br>(.001)  | .006***<br>(.001)  | .006**<br>(.002)  |                   |
| Mom Ever Fight                       | -.021<br>(.042)    | .036<br>(.073)     | .004<br>(.044)     | .086<br>(.099)    |                   |
| Mom Ever Steal                       | -.033<br>(.034)    | -.068<br>(.060)    | -.044<br>(.036)    | -.193*<br>(.086)  |                   |
| Mother US Born                       | .020<br>(.063)     | -.201+<br>(.111)   | .014<br>(.066)     | .007<br>(.374)    |                   |
| Constant                             | -.481***<br>(.135) | -.456+<br>(.246)   | -.503***<br>(.141) | -.906*<br>(.444)  | -.285<br>(.180)   |
| Observations                         | 5984               | 1925               | 5492               | 1925              | 5492              |

Note. Standard errors in parentheses

+  $p < .10$ , \*  $p < .05$ , \*\*  $p < .01$ , \*\*\*  $p < .001$

Standardized HOME Score. Control variables include: Mom's birth year, Child's birth decade (born 1980s, 1990s, 2000s)

**Table S10:** Adjusted total net family income at age 2/3 regressed on maternal experience (Years before first birth and years between first and given child) and controls

|                                      | OLS                 |                    |                     | Fixed Effects       |                 |
|--------------------------------------|---------------------|--------------------|---------------------|---------------------|-----------------|
|                                      | Full Sample         | Cousin Sample      | Sibling Sample      | Cousin FE           | Sibling FE      |
|                                      | (1)                 | (2)                | (3)                 | (4)                 | (5)             |
| Years between age 16 and first child | .026***<br>(.006)   | .026*<br>(.011)    | .029***<br>(.006)   | .001<br>(.014)      |                 |
| Years between first and given child  | .006<br>(.006)      | .009<br>(.010)     | .006<br>(.006)      | .013<br>(.009)      | .004<br>(.008)  |
| Number of siblings before birth      | .018<br>(.014)      | -.004<br>(.022)    | .019<br>(.014)      | -.023<br>(.031)     | -.007<br>(.026) |
| <i>Mediator</i>                      |                     |                    |                     |                     |                 |
| Mother's Education at birth          | .079***<br>(.014)   | .086**<br>(.028)   | .076***<br>(.014)   | .064*<br>(.030)     | .012<br>(.018)  |
| <i>Covariates</i>                    |                     |                    |                     |                     |                 |
| Black                                | -.123**<br>(.039)   | -.114<br>(.071)    | -.104*<br>(.041)    | 1.533***<br>(.175)  |                 |
| Hispanic                             | -.015<br>(.042)     | -.010<br>(.082)    | .006<br>(.043)      | .536<br>(.360)      |                 |
| Female                               | .022<br>(.025)      | -.019<br>(.042)    | .015<br>(.026)      | .032<br>(.041)      | .019<br>(.037)  |
| Firstborn                            | -.056<br>(.039)     | -.018<br>(.068)    | -.035<br>(.042)     | -.009<br>(.063)     | -.070<br>(.045) |
| AFQT Score                           | .005***<br>(.001)   | .004*<br>(.002)    | .005***<br>(.001)   | .007**<br>(.003)    |                 |
| Mom Ever Fight                       | -.001<br>(.032)     | .002<br>(.060)     | .008<br>(.033)      | .094+<br>(.056)     |                 |
| Mom Ever Steal                       | .006<br>(.037)      | -.069<br>(.053)    | -.003<br>(.036)     | -.241<br>(.155)     |                 |
| Mother US Born                       | -.146+<br>(.077)    | -.118<br>(.110)    | -.102<br>(.067)     | .041<br>(.196)      |                 |
| Constant                             | -1.212***<br>(.188) | -1.319**<br>(.402) | -1.234***<br>(.202) | -1.634***<br>(.421) | -.075<br>(.234) |
| Observations                         | 6544                | 2090               | 5960                | 2090                | 5960            |

Note. Standard errors in parentheses

+  $p < .10$ , \*  $p < .05$ , \*\*  $p < .01$ , \*\*\*  $p < .001$

Control variables include: Mom's birth year, Child's birth decade (born 1980s, 1990s, 2000s)

**Table S11:** Fraction of 5 years before birth single parent household regressed on maternal experience (Years before first birth and years between first and given child) and controls

|                                      | OLS                |                    |                    | Fixed Effects      |                    |
|--------------------------------------|--------------------|--------------------|--------------------|--------------------|--------------------|
|                                      | Full Sample        | Cousin Sample      | Sibling Sample     | Cousin FE          | Sibling FE         |
|                                      | (1)                | (2)                | (3)                | (4)                | (5)                |
| Years between age 16 and first child | -.018***<br>(.002) | -.021***<br>(.004) | -.018***<br>(.002) | -.014***<br>(.004) |                    |
| Years between first and given child  | -.003<br>(.002)    | -.008+<br>(.004)   | -.003<br>(.002)    | -.010*<br>(.004)   | -.004<br>(.003)    |
| Number of siblings before birth      | -.028**<br>(.010)  | -.014<br>(.017)    | -.028**<br>(.010)  | -.033+<br>(.017)   | -.053***<br>(.010) |
| <i>Mediator</i>                      |                    |                    |                    |                    |                    |
| Mother's Education at birth          | -.011***<br>(.003) | -.017**<br>(.006)  | -.011***<br>(.003) | -.010<br>(.006)    | -.005<br>(.003)    |
| <i>Covariates</i>                    |                    |                    |                    |                    |                    |
| Black                                | .261***<br>(.016)  | .245***<br>(.031)  | .262***<br>(.017)  | .014<br>(.061)     |                    |
| Hispanic                             | .045**<br>(.016)   | .022<br>(.030)     | .035*<br>(.017)    | .150<br>(.094)     |                    |
| Female                               | .005<br>(.008)     | -.013<br>(.014)    | .003<br>(.008)     | -.005<br>(.012)    | .005<br>(.007)     |
| Firstborn                            | .245***<br>(.012)  | .253***<br>(.022)  | .242***<br>(.012)  | .214***<br>(.018)  | .208***<br>(.010)  |
| AFQT Score                           | -.002***<br>(.000) | -.002***<br>(.001) | -.002***<br>(.000) | -.002*<br>(.001)   |                    |
| Mom Ever Fight                       | .035*<br>(.016)    | .032<br>(.026)     | .033*<br>(.017)    | .026<br>(.037)     |                    |
| Mom Ever Steal                       | .051***<br>(.012)  | .035+<br>(.021)    | .047***<br>(.013)  | .031<br>(.030)     |                    |
| Mother US Born                       | .058*<br>(.023)    | .074+<br>(.042)    | .055*<br>(.024)    | .149*<br>(.075)    |                    |
| Constant                             | .675***<br>(.049)  | .819***<br>(.088)  | .680***<br>(.051)  | .644***<br>(.118)  | .763<br>(1.226)    |
| Observations                         | 7691               | 2423               | 6937               | 2423               | 6937               |

Note. Standard errors in parentheses

+  $p < .10$ , \*  $p < .05$ , \*\*  $p < .01$ , \*\*\*  $p < .001$

Control variables include: Mom's birth year, Child's birth decade (born 1980s, 1990s, 2000s)

**Table S12:** Mother's education at birth predicted by years between age 16 and first birth (2SLS Model)

|                                      | Years between Age 16<br>and first birth | Mother's Education at<br>Birth |
|--------------------------------------|-----------------------------------------|--------------------------------|
|                                      | First Stage                             | Second Stage                   |
| <i>Instrumental Variable</i>         |                                         |                                |
| Prior Medicaid funding restrictions  | -.706***<br>(.156)                      |                                |
| <i>State Characteristics</i>         |                                         |                                |
| Income per capita                    | -.237***<br>(.031)                      |                                |
| Unemployment Rate                    | -.088***<br>(.023)                      |                                |
| Average AFDC Benefit per Family      | .001+<br>(.001)                         |                                |
| <i>Predicted Value for 2SLS</i>      |                                         |                                |
| Years between Age 16 and first birth |                                         | 0.235*<br>(0.096)              |
| Constant                             | 11.209***<br>(.392)                     | 7.510***<br>(1.054)            |
| R <sup>2</sup>                       | .455                                    | .507                           |
| F-Statistic                          | 20.582                                  | 20.582                         |
| N                                    | 5135                                    | 5135                           |

Standard errors in parentheses

+  $p < 0.10$ , \*  $p < 0.05$ , \*\*  $p < 0.01$ , \*\*\*  $p < 0.001$

Control variables include: years between first and given child, number of siblings before birth, black, Hispanic, female, firstborn, Mother's AFQT score, mother ever fight, mother ever stole, mother US born, first born

## **B: Approaches to addressing general experience endogeneity**

Given the possible endogeneity in the relationship between general life experience and our outcomes, we attempted an instrumental variables approach to understand the causal impact of an additional year of general life experience. We attempted an instrumental variable approach using both age of menarche and miscarriages before the first birth as instruments for years between age 16 and first child following prior literature (e.g. Miller, 2011; Hotz et al., 2005). We found age of menarche to produce a very weak first stage, which resulted in a poor instrument for the purposes of this analysis. In regards to miscarriages, we found miscarriages to produce a strong first stage equation but the small number of miscarriages before the first birth in our sample resulted in standard errors that were too large to detect significance given the size of the coefficients in our OLS results (Tables 3-5).

We also attempted using the timing of changes in abortion laws across states from 1970 to 1998 as instruments. Specifically, Medicaid funding restrictions, and parental notification or consent laws from Bitler and Zavodny (2001) were used in our analysis. The timing of those changes fit particularly well with the year of birth of the first born children in our sample.

Given the age of mothers for these law changes, they could have an effect on teen pregnancy. As such, we took advantage of these law changes to see if they could be an instrument to look at the causal impact of a teen birth on our outcomes of interest. Similarly, we find that using these laws resulted in standard errors that were too large to detect significance given the effect sizes in our regressions. So our estimates of the effects were neither significantly different from zero nor significantly different from our main OLS results.



### C: Non-linearities and Heterogeneity

**Table S13 Non-linear Relations**

**Panel A: Math in Early Adolescence Regressed on Maternal Experience and other controls**

|                                                                            | OLS               |                 |                   | Fixed Effects   |                 | With Mediators    |                 |                 |
|----------------------------------------------------------------------------|-------------------|-----------------|-------------------|-----------------|-----------------|-------------------|-----------------|-----------------|
|                                                                            | Full Sample       | Cousin Sample   | Sibling Sample    | Cousin FE       | Sibling FE      | OLS               | Cousin FE       | Sibling FE      |
|                                                                            | (1)               | (2)             | (3)               | (4)             | (5)             | (6)               | (7)             | (8)             |
| Years between age 16 and first child<br>(2-year categories – Baseline 0-2) |                   |                 |                   |                 |                 |                   |                 |                 |
| 2-4 Years                                                                  | .087<br>(.056)    | -.055<br>(.108) | .087<br>(.056)    | .019<br>(.170)  |                 | .044<br>(.055)    | -.022<br>(.170) |                 |
| 4-6 Years                                                                  | .143*<br>(.060)   | -.062<br>(.115) | .133*<br>(.061)   | .034<br>(.163)  |                 | .080<br>(.060)    | -.014<br>(.166) |                 |
| 6-8 Years                                                                  | .176**<br>(.065)  | .110<br>(.119)  | .154*<br>(.066)   | .123<br>(.165)  |                 | .091<br>(.066)    | .049<br>(.164)  |                 |
| 8-10 Years                                                                 | .236***<br>(.068) | -.024<br>(.124) | .220**<br>(.069)  | -.033<br>(.168) |                 | .131+<br>(.069)   | -.113<br>(.167) |                 |
| 10-12 Years                                                                | .312***<br>(.074) | .085<br>(.134)  | .318***<br>(.076) | .091<br>(.177)  |                 | .182*<br>(.076)   | -.022<br>(.184) |                 |
| 12-14 Years                                                                | .396***<br>(.083) | .190<br>(.146)  | .372***<br>(.086) | .331<br>(.210)  |                 | .257**<br>(.086)  | .231<br>(.211)  |                 |
| 14-16 Years                                                                | .351***<br>(.094) | .086<br>(.172)  | .386***<br>(.101) | .077<br>(.230)  |                 | .220*<br>(.098)   | .033<br>(.234)  |                 |
| 16+ Years                                                                  | .501***<br>(.098) | .272<br>(.182)  | .511***<br>(.102) | .288<br>(.239)  |                 | .363***<br>(.101) | .157<br>(.243)  |                 |
| Years between first and given child<br>(2-year categories – Baseline 0-2)  |                   |                 |                   |                 |                 |                   |                 |                 |
| 2-4 Years                                                                  | .024<br>(.048)    | -.003<br>(.086) | .026<br>(.048)    | -.002<br>(.088) | -.056<br>(.055) | .018<br>(.048)    | -.020<br>(.087) | -.034<br>(.056) |
| 4-6 Years                                                                  | .021<br>(.054)    | .045<br>(.092)  | .021<br>(.054)    | .017<br>(.095)  | -.030<br>(.063) | .005<br>(.054)    | -.019<br>(.097) | .004<br>(.065)  |
| 6-8 Years                                                                  | .056<br>(.065)    | -.040<br>(.118) | .055<br>(.065)    | .054<br>(.119)  | -.016<br>(.073) | .041<br>(.065)    | .010<br>(.119)  | .011<br>(.076)  |

|                         |                                                                           |          |        |          |        |        |          |        |         |
|-------------------------|---------------------------------------------------------------------------|----------|--------|----------|--------|--------|----------|--------|---------|
|                         | 8+ Years                                                                  | .176*    | .081   | .168*    | .186   | .089   | .140*    | .128   | .107    |
|                         |                                                                           | (.071)   | (.127) | (.071)   | (.135) | (.089) | (.070)   | (.134) | (.089)  |
|                         | Number of siblings before birth                                           | -.062**  | -.034  | -.063**  | -.056  | .029   | -.033    | -.078  | .086    |
|                         |                                                                           | (.020)   | (.034) | (.020)   | (.047) | (.028) | (.021)   | (.052) | (.071)  |
| <i>Mediators</i>        |                                                                           |          |        |          |        |        |          |        |         |
|                         | Mother's education at birth                                               |          |        |          |        |        | .038***  | .041+  | .013    |
|                         |                                                                           |          |        |          |        |        | (.009)   | (.022) | (.016)  |
|                         | HOME score at age 2/3                                                     |          |        |          |        |        | .105***  | .048   | .042+   |
|                         |                                                                           |          |        |          |        |        | (.016)   | (.031) | (.022)  |
|                         | Birth weight                                                              |          |        |          |        |        | .052***  | .076** | .079*** |
|                         |                                                                           |          |        |          |        |        | (.014)   | (.029) | (.022)  |
|                         | Prenatal cigarette use per day                                            |          |        |          |        |        | .025     | .084+  | .016    |
|                         |                                                                           |          |        |          |        |        | (.017)   | (.050) | (.031)  |
|                         | Prenatal alcohol use per month                                            |          |        |          |        |        | .025+    | .029   | .019    |
|                         |                                                                           |          |        |          |        |        | (.014)   | (.031) | (.021)  |
|                         | Fraction of years between birth and age 12 biological father in household |          |        |          |        |        | -.159*** | -.128  | -.181   |
|                         |                                                                           |          |        |          |        |        | (.047)   | (.127) | (.139)  |
|                         | Number of siblings between birth and age 13                               |          |        |          |        |        | -.039*   | -.086* | .048    |
|                         |                                                                           |          |        |          |        |        | (.015)   | (.034) | (.071)  |
|                         | Adjusted total family income at age 2/3                                   |          |        |          |        |        | .004     | .009   | -.000   |
|                         |                                                                           |          |        |          |        |        | (.011)   | (.021) | (.013)  |
|                         | Fraction of 5 years before birth of single parent household               |          |        |          |        |        | .026     | -.029  | .145+   |
|                         |                                                                           |          |        |          |        |        | (.046)   | (.100) | (.076)  |
|                         | Constant                                                                  | -.391*** | -.131  | -.381*** | .058   | .142** | -.643*** | -.215  | -.165   |
|                         |                                                                           | (.113)   | (.203) | (.115)   | (.301) | (.049) | (.146)   | (.402) | (.251)  |
|                         | Observations                                                              | 5380     | 1762   | 4967     | 1762   | 4967   | 5380     | 1762   | 4967    |
| <i>Additional Tests</i> |                                                                           |          |        |          |        |        |          |        |         |
|                         | Years between age 16 and first child                                      |          |        |          |        |        |          |        |         |
|                         | <i>Joint Differences (p-value)</i>                                        | .000     | .205   | .000     | .392   |        | .027     | .526   |         |
|                         | <i>Joint Differences from 0 (p-value)</i>                                 | .000     | .251   | .000     | .497   |        | .040     | .616   |         |
|                         | Years between first and given child                                       |          |        |          |        |        |          |        |         |
|                         | <i>Joint Differences (p-value)</i>                                        | .031     | .626   | .052     | .417   | .278   | .084     | .572   | .330    |
|                         | <i>Joint Differences from 0 (p-value)</i>                                 | .059     | .776   | .093     | .583   | .308   | .152     | .725   | .458    |

**Panel B: Reading in Early Adolescence Regressed on Maternal Experience and other controls**

|                                                                               | OLS               |                 |                   | Fixed Effects   |                  | With Mediators    |                 |                  |
|-------------------------------------------------------------------------------|-------------------|-----------------|-------------------|-----------------|------------------|-------------------|-----------------|------------------|
|                                                                               | Full Sample       | Cousin Sample   | Sibling Sample    | Cousin FE       | Sibling FE       | OLS               | Cousin FE       | Sibling FE       |
|                                                                               | (1)               | (2)             | (3)               | (4)             | (5)              | (6)               | (7)             | (8)              |
| Years between age 16 and first child (2-year categories – Baseline 0-2 Years) |                   |                 |                   |                 |                  |                   |                 |                  |
| 2-4 Years                                                                     | .096<br>(.065)    | -.024<br>(.118) | .094<br>(.066)    | .024<br>(.186)  |                  | .049<br>(.064)    | -.011<br>(.185) |                  |
| 4-6 Years                                                                     | .154*<br>(.066)   | -.026<br>(.114) | .156*<br>(.067)   | .035<br>(.186)  |                  | .088<br>(.065)    | .007<br>(.188)  |                  |
| 6-8 Years                                                                     | .202**<br>(.070)  | .121<br>(.127)  | .185**<br>(.071)  | .121<br>(.190)  |                  | .115+<br>(.070)   | .060<br>(.190)  |                  |
| 8-10 Years                                                                    | .251***<br>(.075) | .025<br>(.128)  | .260***<br>(.077) | .012<br>(.184)  |                  | .144+<br>(.075)   | -.033<br>(.189) |                  |
| 10-12 Years                                                                   | .286***<br>(.079) | .146<br>(.135)  | .309***<br>(.081) | .115<br>(.201)  |                  | .157+<br>(.080)   | .044<br>(.208)  |                  |
| 12-14 Years                                                                   | .310***<br>(.088) | .242<br>(.148)  | .317***<br>(.092) | .187<br>(.219)  |                  | .177+<br>(.090)   | .124<br>(.223)  |                  |
| 14-16 Years                                                                   | .253*<br>(.099)   | .084<br>(.180)  | .294**<br>(.104)  | -.004<br>(.246) |                  | .119<br>(.100)    | -.012<br>(.254) |                  |
| 16+ Years                                                                     | .365***<br>(.100) | .171<br>(.180)  | .376***<br>(.104) | .058<br>(.248)  |                  | .228*<br>(.103)   | -.039<br>(.256) |                  |
| Years between first and given child (2-year categories – Baseline 0-2 Years)  |                   |                 |                   |                 |                  |                   |                 |                  |
| 2-4 Years                                                                     | .038<br>(.050)    | .069<br>(.085)  | .040<br>(.050)    | .084<br>(.083)  | .047<br>(.054)   | .037<br>(.050)    | .080<br>(.083)  | .051<br>(.055)   |
| 4-6 Years                                                                     | .089<br>(.057)    | .127<br>(.103)  | .094<br>(.057)    | .157<br>(.100)  | .103+<br>(.061)  | .078<br>(.058)    | .145<br>(.101)  | .115+<br>(.064)  |
| 6-8 Years                                                                     | -.003<br>(.066)   | -.076<br>(.119) | .005<br>(.067)    | .039<br>(.123)  | -.018<br>(.075)  | -.010<br>(.067)   | .020<br>(.123)  | -.011<br>(.077)  |
| 8+ Years                                                                      | .286***<br>(.073) | .279*<br>(.132) | .300***<br>(.074) | .334*<br>(.141) | .261**<br>(.092) | .263***<br>(.073) | .300*<br>(.142) | .255**<br>(.093) |
| Number of siblings before birth                                               | -.107***          | -.112**         | -.107***          | -.118*          | -.070*           | -.080***          | -.145*          | .018             |

|                                                                           |          |        |          |        |        |          |         |        |
|---------------------------------------------------------------------------|----------|--------|----------|--------|--------|----------|---------|--------|
|                                                                           | (.019)   | (.035) | (.019)   | (.050) | (.028) | (.020)   | (.057)  | (.067) |
| <i>Mediators</i>                                                          |          |        |          |        |        |          |         |        |
| Mother's education at birth                                               |          |        |          |        |        | .031**   | .023    | .007   |
|                                                                           |          |        |          |        |        | (.010)   | (.020)  | (.015) |
| HOME score at age 2/3                                                     |          |        |          |        |        | .106***  | .061+   | .047*  |
|                                                                           |          |        |          |        |        | (.017)   | (.034)  | (.021) |
| Birth weight                                                              |          |        |          |        |        | .037*    | .057*   | .054*  |
|                                                                           |          |        |          |        |        | (.014)   | (.029)  | (.021) |
| Prenatal cigarette use per day                                            |          |        |          |        |        | -.013    | .087*   | .013   |
|                                                                           |          |        |          |        |        | (.018)   | (.044)  | (.030) |
| Prenatal alcohol use per month                                            |          |        |          |        |        | -.002    | .002    | -.008  |
|                                                                           |          |        |          |        |        | (.014)   | (.031)  | (.021) |
| Fraction of years between birth and age 12 biological father in household |          |        |          |        |        | -.166**  | -.214   | -.167  |
|                                                                           |          |        |          |        |        | (.051)   | (.131)  | (.138) |
| Number of siblings between birth and age 13                               |          |        |          |        |        | -.036*   | -.099** | .086   |
|                                                                           |          |        |          |        |        | (.015)   | (.037)  | (.068) |
| Adjusted total family income at age 2/3                                   |          |        |          |        |        | .006     | -.002   | -.014  |
|                                                                           |          |        |          |        |        | (.011)   | (.023)  | (.014) |
| Fraction of 5 years before birth of single parent household               |          |        |          |        |        | .054     | .053    | .040   |
|                                                                           |          |        |          |        |        | (.049)   | (.105)  | (.077) |
| Constant                                                                  | -.654*** | -.496* | -.659*** | -.101  | -.030  | -.834*** | -.140   | -.274  |
|                                                                           | (.126)   | (.226) | (.130)   | (.384) | (.048) | (.157)   | (.445)  | (.250) |
| Observations                                                              | 5376     | 1762   | 4963     | 1762   | 4963   | 5376     | 1762    | 4963   |
| <i>Additional Tests</i>                                                   |          |        |          |        |        |          |         |        |
| Years between age 16 and first child                                      |          |        |          |        |        |          |         |        |
| <i>Joint Differences (p-value)</i>                                        | .071     | .389   | .066     | .953   |        | .557     | .980    |        |
| <i>Joint Differences from 0 (p-value)</i>                                 | .016     | .493   | .017     | .970   |        | .508     | .991    |        |
| Years between first and given child                                       |          |        |          |        |        |          |         |        |
| <i>Joint Differences (p-value)</i>                                        | .000     | .001   | .000     | .034   | .001   | .000     | .048    | .002   |
| <i>Joint Differences from 0 (p-value)</i>                                 | .000     | .001   | .000     | .039   | .002   | .000     | .059    | .003   |

**Panel C: Externalizing in Early Adolescence Regressed on Maternal Experience and other controls**

|                                                                               | OLS                            |                               |                                | Fixed Effects                |                              | With Mediators                 |                              |                              |
|-------------------------------------------------------------------------------|--------------------------------|-------------------------------|--------------------------------|------------------------------|------------------------------|--------------------------------|------------------------------|------------------------------|
|                                                                               | Full Sample                    | Cousin Sample                 | Sibling Sample                 | Cousin FE                    | Sibling FE                   | OLS                            | Cousin FE                    | Sibling FE                   |
|                                                                               | (1)                            | (2)                           | (3)                            | (4)                          | (5)                          | (6)                            | (7)                          | (8)                          |
| Years between age 16 and first child (2-year categories – Baseline 0-2 Years) |                                |                               |                                |                              |                              |                                |                              |                              |
| 2-4 Years                                                                     | -.145 <sup>+</sup><br>(.075)   | -.120<br>(.130)               | -.136 <sup>+</sup><br>(.075)   | .053<br>(.169)               |                              | -.086<br>(.071)                | .046<br>(.167)               |                              |
| 4-6 Years                                                                     | -.244 <sup>***</sup><br>(.072) | -.050<br>(.125)               | -.244 <sup>***</sup><br>(.073) | .057<br>(.169)               |                              | -.158 <sup>*</sup><br>(.069)   | .056<br>(.167)               |                              |
| 6-8 Years                                                                     | -.366 <sup>***</sup><br>(.077) | -.346 <sup>**</sup><br>(.126) | -.377 <sup>***</sup><br>(.078) | -.088<br>(.165)              |                              | -.243 <sup>**</sup><br>(.077)  | -.093<br>(.168)              |                              |
| 8-10 Years                                                                    | -.421 <sup>***</sup><br>(.084) | -.224<br>(.150)               | -.421 <sup>***</sup><br>(.086) | -.110<br>(.174)              |                              | -.266 <sup>**</sup><br>(.083)  | -.119<br>(.179)              |                              |
| 10-12 Years                                                                   | -.519 <sup>***</sup><br>(.086) | -.329 <sup>*</sup><br>(.140)  | -.500 <sup>***</sup><br>(.089) | -.297 <sup>+</sup><br>(.177) |                              | -.341 <sup>***</sup><br>(.087) | -.305 <sup>+</sup><br>(.181) |                              |
| 12-14 Years                                                                   | -.524 <sup>***</sup><br>(.097) | -.416 <sup>**</sup><br>(.153) | -.534 <sup>***</sup><br>(.101) | -.425 <sup>*</sup><br>(.184) |                              | -.350 <sup>***</sup><br>(.098) | -.425 <sup>*</sup><br>(.190) |                              |
| 14-16 Years                                                                   | -.519 <sup>***</sup><br>(.104) | -.386 <sup>*</sup><br>(.177)  | -.515 <sup>***</sup><br>(.109) | -.410 <sup>*</sup><br>(.207) |                              | -.329 <sup>**</sup><br>(.104)  | -.431 <sup>*</sup><br>(.217) |                              |
| 16+ Years                                                                     | -.499 <sup>***</sup><br>(.106) | -.384 <sup>*</sup><br>(.172)  | -.506 <sup>***</sup><br>(.112) | -.304<br>(.205)              |                              | -.315 <sup>**</sup><br>(.108)  | -.318<br>(.214)              |                              |
| Years between first and given child (2-year categories – Baseline 0-2)        |                                |                               |                                |                              |                              |                                |                              |                              |
| 2-4 Years                                                                     | -.021<br>(.054)                | -.017<br>(.084)               | -.023<br>(.054)                | .008<br>(.080)               | .014<br>(.056)               | -.030<br>(.053)                | .014<br>(.080)               | .012<br>(.056)               |
| 4-6 Years                                                                     | -.043<br>(.062)                | -.033<br>(.095)               | -.044<br>(.062)                | -.061<br>(.094)              | -.032<br>(.065)              | -.038<br>(.061)                | -.043<br>(.095)              | -.030<br>(.066)              |
| 6-8 Years                                                                     | -.096<br>(.070)                | -.096<br>(.118)               | -.096<br>(.070)                | -.193 <sup>+</sup><br>(.114) | -.094<br>(.080)              | -.102<br>(.069)                | -.182<br>(.114)              | -.090<br>(.081)              |
| 8+ Years                                                                      | -.232 <sup>**</sup><br>(.078)  | -.251 <sup>*</sup><br>(.127)  | -.231 <sup>**</sup><br>(.079)  | -.187<br>(.128)              | -.217 <sup>*</sup><br>(.094) | -.234 <sup>**</sup><br>(.077)  | -.160<br>(.130)              | -.220 <sup>*</sup><br>(.094) |
| Number of siblings before birth                                               | -.007<br>(.021)                | .027<br>(.038)                | -.006<br>(.021)                | -.040<br>(.038)              | -.012<br>(.027)              | -.034<br>(.022)                | -.065<br>(.041)              | .036<br>(.062)               |

| <i>Mediators</i>                                                          |                   |                |                   |                 |                 |                   |                |                |  |
|---------------------------------------------------------------------------|-------------------|----------------|-------------------|-----------------|-----------------|-------------------|----------------|----------------|--|
| Mother's education at birth                                               |                   |                |                   |                 |                 |                   |                |                |  |
|                                                                           |                   |                |                   |                 |                 |                   |                |                |  |
| HOME score at age 2/3                                                     |                   |                |                   |                 |                 |                   |                |                |  |
|                                                                           |                   |                |                   |                 |                 |                   |                |                |  |
| Birth weight                                                              |                   |                |                   |                 |                 |                   |                |                |  |
|                                                                           |                   |                |                   |                 |                 |                   |                |                |  |
| Prenatal cigarette use per day                                            |                   |                |                   |                 |                 |                   |                |                |  |
|                                                                           |                   |                |                   |                 |                 |                   |                |                |  |
| Prenatal alcohol use per month                                            |                   |                |                   |                 |                 |                   |                |                |  |
|                                                                           |                   |                |                   |                 |                 |                   |                |                |  |
| Fraction of years between birth and age 12 biological father in household |                   |                |                   |                 |                 |                   |                |                |  |
|                                                                           |                   |                |                   |                 |                 |                   |                |                |  |
| Number of siblings between birth and age 13                               |                   |                |                   |                 |                 |                   |                |                |  |
|                                                                           |                   |                |                   |                 |                 |                   |                |                |  |
| Adjusted total family income at age 2/3                                   |                   |                |                   |                 |                 |                   |                |                |  |
|                                                                           |                   |                |                   |                 |                 |                   |                |                |  |
| Fraction of 5 years before birth of single parent household               |                   |                |                   |                 |                 |                   |                |                |  |
|                                                                           |                   |                |                   |                 |                 |                   |                |                |  |
| Constant                                                                  | .562***<br>(.132) | .146<br>(.219) | .540***<br>(.136) | .596+<br>(.316) | .125*<br>(.049) | .582***<br>(.157) | .409<br>(.355) | .173<br>(.223) |  |
| Observations                                                              | 5673              | 1830           | 5215              | 1830            | 5215            | 5673              | 1830           | 5215           |  |
| <i>Additional Tests</i>                                                   |                   |                |                   |                 |                 |                   |                |                |  |
| Years between age 16 and first child                                      |                   |                |                   |                 |                 |                   |                |                |  |
| <i>Joint Differences (p-value)</i>                                        | .000              | .050           | .000              | .069            |                 | .033              | .073           |                |  |
| <i>Joint Differences from 0 (p-value)</i>                                 | .000              | .039           | .000              | .096            |                 | .010              | .106           |                |  |
| Years between first and given child                                       |                   |                |                   |                 |                 |                   |                |                |  |
| <i>Joint Differences (p-value)</i>                                        | .004              | .114           | .006              | .107            | .031            | .003              | .132           | .028           |  |
| <i>Joint Differences from 0 (p-value)</i>                                 | .009              | .201           | .013              | .192            | .063            | .007              | .227           | .058           |  |

Note. Standard errors in parentheses. Age 10 to 13 externalizing scores are standardized values for children with valid values in at least one year.

+  $p < .10$ , \*  $p < .05$ , \*\*  $p < .01$ , \*\*\*  $p < .001$

Control variables include: black, Hispanic, female, firstborn, Mother's AFQT score, mother ever fight, mother ever stole, mother US born, first born, Mom's birth year, Child's birth decade (born 1980s, 1990s, 2000s)

**Table S14: Exploring differential effects of maternal age by race, maternal education and maternal IQ Panel**

**A: Math**

|                                                                  | (1)                | (2)                | (3)                | (4)                |
|------------------------------------------------------------------|--------------------|--------------------|--------------------|--------------------|
| Life Experience                                                  | .031***<br>(.008)  | .040***<br>(.006)  | .044***<br>(.008)  | .050***<br>(.014)  |
| Parent Experience                                                | .032***<br>(.009)  | .027***<br>(.007)  | .036***<br>(.007)  | .050***<br>(.012)  |
| Number of siblings before birth                                  | -.100***<br>(.024) | -.080***<br>(.021) | -.077***<br>(.020) | -.079***<br>(.020) |
| <b>Moderation</b>                                                |                    |                    |                    |                    |
| Mom Education is Greater than HS Graduate                        | .172+<br>(.101)    |                    |                    |                    |
| Life Experience X Mom Education is Greater than HS Graduate      | -.003<br>(.009)    |                    |                    |                    |
| Parenting Experience X Mom Education is Greater than HS Graduate | -.003<br>(.009)    |                    |                    |                    |
| Black                                                            | -.257***<br>(.046) | -.221**<br>(.085)  | -.228***<br>(.038) | -.230***<br>(.038) |
| Life Experience X Black                                          |                    | -.004<br>(.008)    |                    |                    |
| Parenting Experience X Black                                     |                    | .006<br>(.007)     |                    |                    |
| Hispanic                                                         | -.147**<br>(.049)  | -.168+<br>(.096)   | -.125**<br>(.042)  | -.127**<br>(.042)  |
| Life Experience X Hispanic                                       |                    | -.001<br>(.009)    |                    |                    |
| Parenting Experience X Hispanic                                  |                    | .012<br>(.008)     |                    |                    |
| Mother AFQT Score                                                | .013***<br>(.001)  | .014***<br>(.001)  | .015***<br>(.002)  | .014***<br>(.001)  |
| Life Experience X Mother AFQT ( $\times 10^{-3}$ )               |                    |                    | -.1345<br>(.1248)  |                    |
| Parenting Experience X Mother AFQT ( $\times 10^{-3}$ )          |                    |                    | -.1445<br>(.1188)  |                    |
| Mother US Born                                                   | -.124+<br>(.072)   | -.114+<br>(.066)   | -.114+<br>(.066)   | .082<br>(.154)     |

|                                       |                                |                                |                                |                                |
|---------------------------------------|--------------------------------|--------------------------------|--------------------------------|--------------------------------|
| Life Experience X Mother US Born      |                                |                                |                                | -.012<br>(.014)                |
| Parenting Experience X Mother US Born |                                |                                |                                | -.020 <sup>+</sup><br>(.011)   |
| Constant                              | -.487 <sup>***</sup><br>(.137) | -.560 <sup>***</sup><br>(.113) | -.629 <sup>***</sup><br>(.118) | -.748 <sup>***</sup><br>(.168) |
| Observations                          | 3747                           | 5380                           | 5380                           | 5380                           |

Note. Standard errors in parentheses

Covariates not shown include: firstborn, mother ever fight, mother ever steal, child birth year in decade, mom birth year

<sup>+</sup>  $p < .10$ , \*  $p < .05$ , \*\*  $p < .01$ , \*\*\*  $p < .001$



**Panel B: Reading**

|                                                                  | (1)                | (2)                | (3)                  | (4)                |
|------------------------------------------------------------------|--------------------|--------------------|----------------------|--------------------|
| Life Experience                                                  | .037***<br>(.009)  | .027***<br>(.006)  | .046***<br>(.008)    | .038**<br>(.015)   |
| Parent Experience                                                | .046***<br>(.010)  | .032***<br>(.008)  | .044***<br>(.008)    | .054***<br>(.013)  |
| Number of siblings before birth                                  | -.129***<br>(.026) | -.124***<br>(.020) | -.119***<br>(.020)   | -.124***<br>(.020) |
| <b>Moderation</b>                                                |                    |                    |                      |                    |
| Mom Education is Greater than HS Graduate                        | .356***<br>(.103)  |                    |                      |                    |
| Life Experience X Mom Education is Greater than HS Graduate      | -.020*<br>(.009)   |                    |                      |                    |
| Parenting Experience X Mom Education is Greater than HS Graduate | -.020*<br>(.009)   |                    |                      |                    |
| Black                                                            | -.128*<br>(.050)   | -.145<br>(.092)    | -.100*<br>(.042)     | -.110**<br>(.042)  |
| Life Experience X Black                                          |                    | .004<br>(.008)     |                      |                    |
| Parenting Experience X Black                                     |                    | .002<br>(.008)     |                      |                    |
| Hispanic                                                         | .059<br>(.052)     | -.018<br>(.110)    | .070<br>(.045)       | .064<br>(.045)     |
| Life Experience X Hispanic                                       |                    | .003<br>(.009)     |                      |                    |
| Parenting Experience X Hispanic                                  |                    | .012<br>(.009)     |                      |                    |
| Mother AFQT Score                                                | .012***<br>(.001)  | .013***<br>(.001)  | .018***<br>(.002)    | .013***<br>(.001)  |
| Life Experience X Mother AFQT ( $\times 10^{-3}$ )               |                    |                    | -.4451***<br>(.1175) |                    |
| Parenting Experience X Mother AFQT ( $\times 10^{-3}$ )          |                    |                    | -.2639*<br>(.1247)   |                    |
| Mother US Born                                                   | -.039<br>(.081)    | -.081<br>(.071)    | -.082<br>(.071)      | .103<br>(.181)     |

|                                       |                                |                                |                                |                                |
|---------------------------------------|--------------------------------|--------------------------------|--------------------------------|--------------------------------|
| Life Experience X Mother US Born      |                                |                                |                                | -.011<br>(.014)                |
| Parenting Experience X Mother US Born |                                |                                |                                | -.020 <sup>+</sup><br>(.012)   |
| Constant                              | -.882 <sup>***</sup><br>(.150) | -.717 <sup>***</sup><br>(.123) | -.929 <sup>***</sup><br>(.127) | -.915 <sup>***</sup><br>(.191) |
| Observations                          | 3744                           | 5376                           | 5376                           | 5376                           |

Note. Standard errors in parentheses

Covariates not shown include: firstborn, mother ever fight, mother ever steal, child birth year in decade, mom birth year

<sup>+</sup>  $p < .10$ , \*  $p < .05$ , \*\*  $p < .01$ , \*\*\*  $p < .001$

**Panel C: Externalizing**

|                                                                  | (1)                | (2)                | (3)                 | (4)                |
|------------------------------------------------------------------|--------------------|--------------------|---------------------|--------------------|
| Life Experience                                                  | -.031***<br>(.009) | -.018**<br>(.007)  | -.048***<br>(.008)  | -.040**<br>(.014)  |
| Parent Experience                                                | -.015<br>(.010)    | -.009<br>(.008)    | -.024**<br>(.009)   | -.012<br>(.015)    |
| Number of siblings before birth                                  | -.002<br>(.027)    | -.009<br>(.022)    | -.009<br>(.022)     | -.006<br>(.022)    |
| <b>Moderation</b>                                                |                    |                    |                     |                    |
| Mom Education is Greater than HS Graduate                        | -.285**<br>(.107)  |                    |                     |                    |
| Life Experience X Mom Education is Greater than HS Graduate      | .013<br>(.009)     |                    |                     |                    |
| Parenting Experience X Mom Education is Greater than HS Graduate | .008<br>(.009)     |                    |                     |                    |
| Black                                                            | -.001<br>(.055)    | .153<br>(.103)     | -.032<br>(.046)     | -.018<br>(.047)    |
| Life Experience X Black                                          |                    | -.021**<br>(.008)  |                     |                    |
| Parenting Experience X Black                                     |                    | -.004<br>(.009)    |                     |                    |
| Hispanic                                                         | -.046<br>(.056)    | .229*<br>(.109)    | -.078+<br>(.047)    | -.074<br>(.047)    |
| Life Experience X Hispanic                                       |                    | -.026**<br>(.009)  |                     |                    |
| Parenting Experience X Hispanic                                  |                    | -.019*<br>(.009)   |                     |                    |
| Mother AFQT Score                                                | -.002*<br>(.001)   | -.003***<br>(.001) | -.008***<br>(.002)  | -.003***<br>(.001) |
| Life Experience X Mother AFQT ( $\times 10^{-3}$ )               |                    |                    | .4606***<br>(.1317) |                    |
| Parenting Experience X Mother AFQT ( $\times 10^{-3}$ )          |                    |                    | .2966*<br>(.1355)   |                    |
| Mother US Born                                                   | .057<br>(.082)     | .025<br>(.072)     | .035<br>(.071)      | -.043<br>(.196)    |
| Life Experience X Mother US Born                                 |                    |                    |                     | .012               |

|                                       |        |        |         |        |
|---------------------------------------|--------|--------|---------|--------|
| Parenting Experience X Mother US Born |        |        |         | (.014) |
|                                       |        |        |         | -.003  |
| Constant                              | .426** | .348** | .650*** | .531** |
|                                       | (.163) | (.128) | (.136)  | (.204) |
| Observations                          | 3906   | 5673   | 5673    | 5673   |

Note. Standard errors in parentheses

Covariates not shown include: firstborn, mother ever fight, mother ever steal, child birth year in decade, mom birth year

+  $p < .10$ , \*  $p < .05$ , \*\*  $p < .01$ , \*\*\*  $p < .001$
